# Supplementary material for: Permissive microbiome characterizes human subjects with a neurovascular disease cavernous angioma
Source: PubMed Central journal article supplement (PMC7253448; doi:10.1038/s41467-020-16436-w), 2020-05-27
Supplement: 41467_2020_16436_MOESM1_ESM.pdf [file 41467_2020_16436_MOESM1_ESM.pdf]

## ***Supplementary Information***

Polster and Sharma *et al.*

Permissive microbiome characterizes human subjects with a neurovascular disease cavernous angioma

## **Supplementary Discussion**

The 16S rRNA gene amplicon sequencing data was consistent when repeated at two points in time in 38 randomly selected specimens, indicating no batch effect of sequencing. Furthermore, there was no difference related to the clinical sites (Suppl. Fig. 7). To test if including all overlapping bacterial species, identified by both multi-variate and random forest analysis with a relaxed medium relative abundance and significance cutoff (medium relative abundance  $\geq 0.1\%$ , FDR corrected  $p \leq 0.05$ ), could improve discriminative power, ROC curve was generated by using the best combination of all nine overlapping species (Suppl. Fig. 1F). The ROC curve had moderately improved AUC (0.892 vs 0.826) relative to three species with stringent medium relative abundance and significance cutoff.

Because CA patients can have either sporadic/solitary or familial/multifocal form of the disease (Suppl. Fig. 2A), and only familial/multifocal group has germline *CCM* gene mutations, it is possible that mixing sporadic/solitary and familial/multifocal CA patients in our analysis could obscure microbiome differences in either cohort. 16S rRNA gene amplicon sequencing studies showed no difference in  $\alpha$  diversity (Suppl. Fig. 2B), but with significant changes in four multi-variate identified ESVs (Suppl. Fig. 2C). Co-occurrence network studies based on metagenomic shotgun sequencing data showed that sporadic/solitary and familial/multifocal CA patients have different microbial network organization with distinct keystone species (Suppl. Fig. 2D). At the species level, analysis of metagenomic shotgun data show many species are similarly changed in both sporadic/solitary and familial/multifocal CA patients (Suppl. Fig. 2D, E), suggesting that combining sporadic/solitary and familial/multifocal CA patients does not mask differences in either group. A single *Bacteroides dorei* species was identified to be more abundant in sporadic/solitary patients than both non-CA individuals and familial/multifocal patients (Suppl. Fig. 2F, G); however, it was not able to differentiate sporadic/solitary and familial/multifocal CA patients effectively (Suppl. Fig. 2E). These data suggest that CA patients with both sporadic/solitary and familial/multifocal disease have different microbiota than non-CA patients, while differences between sporadic/solitary and familial/multifocal CA patients are limited.

Our data showed that the fecal microbiome in patients with or without germline *CCM* mutations have different organization, (Suppl. Fig. 2B, D). However, very limited species difference was observed in patients with sporadic lesions (without *CCM* germ line mutations) as compared to cases with familial multifocal disease (harboring *CCM* germ line mutations). It is also possible that mutations of different *CCM* genes impact microbiome in different manners, thus combining data from patients with mutations of

different *CCM* genes could obscure the difference between sporadic/solitary and familial/multifocal CA patients. However, metagenomic shotgun studies failed to show significant differences between CA patients with mutations of different *CCM* genes, while some differences can be identified by 16S rRNA gene amplicon sequencing (Suppl. Fig. 3). This calls for future studies with a larger number of CA patients with mutations of different *CCM* genes. Although some fecal microbiome differences can be observed between CASH and non-CASH patients, they do not support effective differentiation between these two CA patient groups (Fig. 3). This may be partially caused by the low CASH case enrollment in the current study. To properly address this question a higher number of cases with symptomatic hemorrhage will be required.

We have adjusted our analyses based on age, gender, and collection site so they do not confound our analyses by excluding species with significant age, gender, and collection site differences. Here, we specifically asked if female and male CA patients have different microbiome and if female CA patients and male CA patients are differentially affected relative to female non-CA and male non-CA patients, respectively. We compared 16S rRNA gene amplicon and metagenomic shotgun sequencing data by multi-variate analyses. Differences between female and male non-CA patients and between female and male CA patients were determined by multi-variate analysis. Relative abundance of these taxonomy units, within these four patient groups, were then compared. Some differences can be seen (Suppl. Fig. 5C, D). With the exception of the low abundance Barnesiellaceae family (Suppl. Fig. 5A) and *Bacteriodes fragilis* (Suppl. Fig. 5B), these species were not differentially represented in female and male CA patients relative to female and male non-CA individuals respectively. Taken together, these results do not support a drastically different microbiome modulation in female non-CA and CA patients relative to male non-CA and CA patients. Because the most significant microbiome differences within the CA cohort was identified in patients with or without aggressive CA disease, we further compared microbiota between female and male CA patients with aggressive disease and between female and male non-aggressive CA patients by multi-variate analysis. Relative abundances of these taxonomy units within these four patient groups were then compared. Some differences can be seen (Suppl. Fig. 5C, D). With the exception of the low abundance S24-7 family (Suppl. Fig. 5C) and *Eubacterium siraenum* (Suppl. Fig. 5D), these species were not differentially represented in female and male patients with aggressive CA relative to female and male patients with non-aggressive CA, respectively. Taken together, these results do not support a drastically different microbiome modulation in female non-aggressive and aggressive CA patients relative to male non-aggressive and aggressive CA patients.

## ***Supplementary Figures***

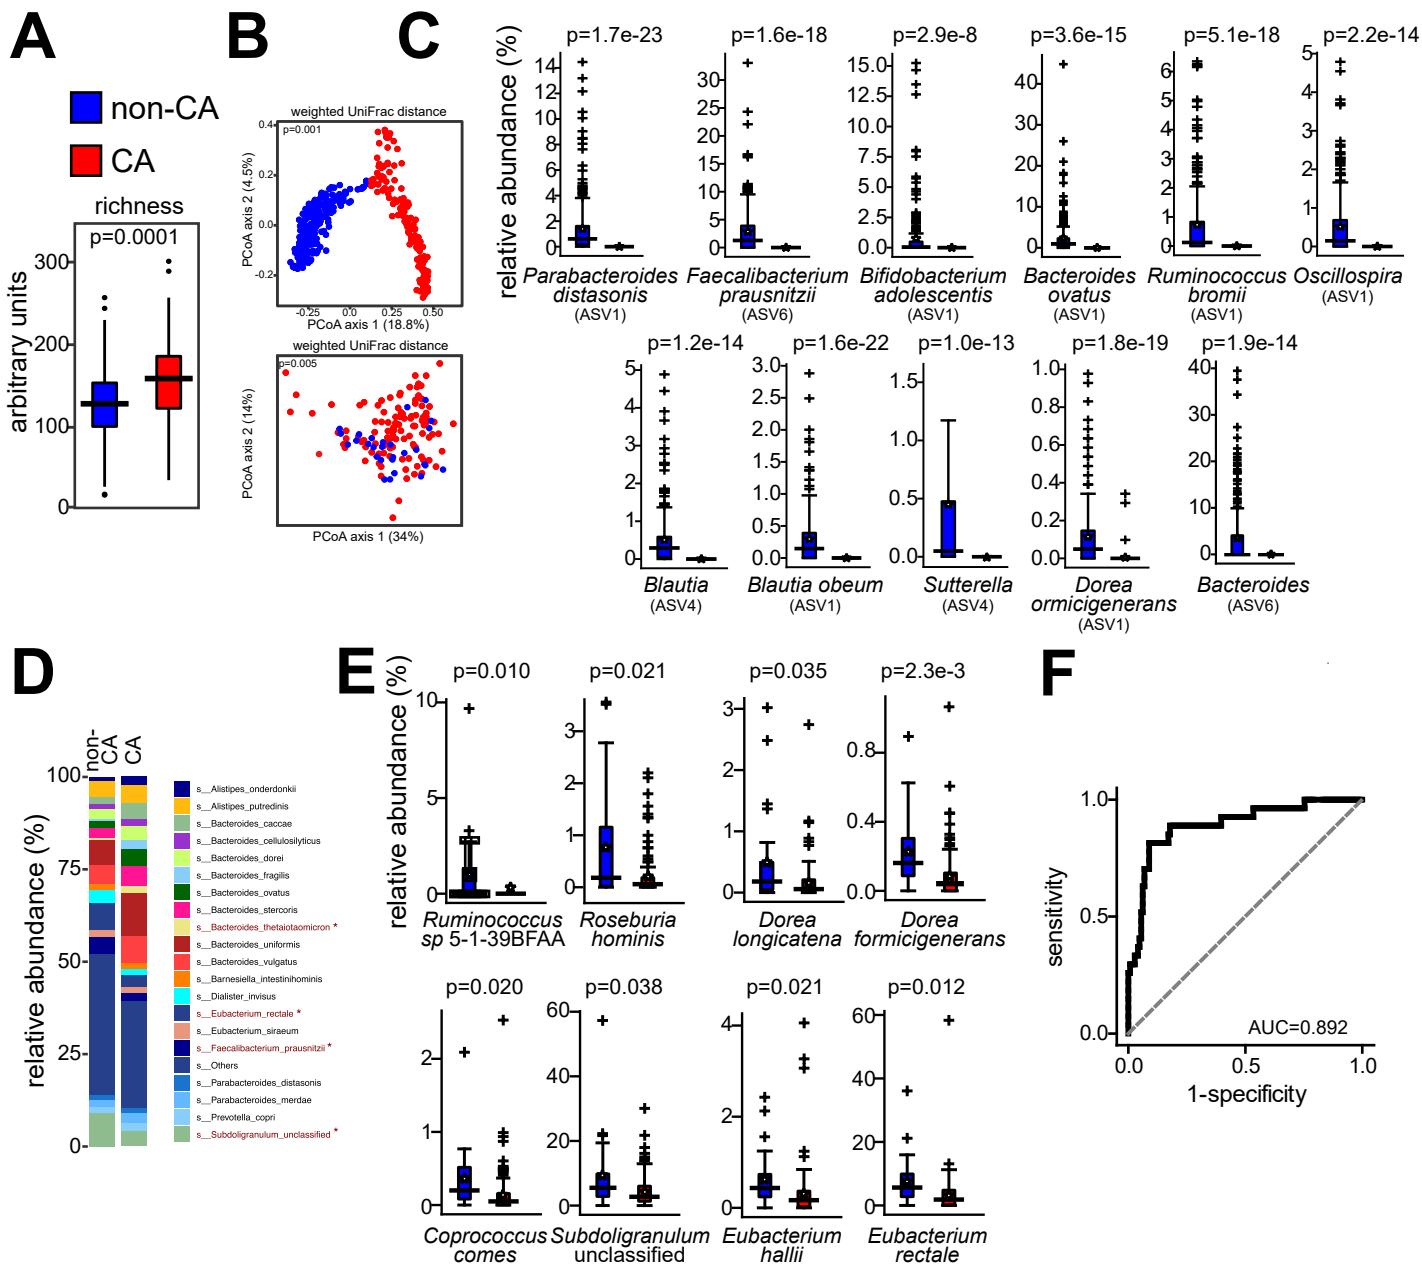

### **Supplementary Figure 1. CA and non-CA cohorts have different microbiota.**

**A.**  $\alpha$  diversity analyses of fecal samples by richness index based on 16S rRNA gene amplicon sequencing data (n=250 non-CA, n=115 CA, Kruskal-Wallis one way analysis of variance test, blue boxes: non-CA cohort, red boxes: CA cohort). **B.** PCoA analysis of  $\beta$  diversity of fecal samples based on 16S rRNA gene amplicon sequencing data. Top panel: comparing with American Gut Project control samples (PERMANOVA test, p=0.001); bottom panel: comparing with University of Pennsylvania control samples (PERMANOVA test, p=0.005). blue: non-CA cohort, red: CA cohort. **C.** Multi-variate taxonomic analyses of 16S rRNA gene amplicon sequencing data. ESVs with significantly different relative abundances (n=250 non-CA, n=115 CA, ANCOM analysis followed by two-sided Mann-Whitney U test with Benjamini-Hochberg FDR correction,  $p_{FDR} \leq 0.05$  but  $> 0.01$ ) or medium relative abundance of  $< 1\%$  in both groups are presented as box-whisker plots (blue boxes: non-CA cohort, red boxes: CA cohort). **D.** Top 20 most abundant species identified based on metagenomic shotgun sequencing data. Species with significantly different abundance are presented in maroon color. **E.** Multi-variate analyses of metagenomic shotgun sequencing data at species level. Species with significantly different abundance (n=27 non-CA, n=122 CA, ANCOM analysis followed by two-sided Mann-Whitney U test with Benjamini-Hochberg FDR correction,  $p_{FDR} \leq 0.05$ , but  $> 0.01$ ) or medium relative abundance  $< 0.25\%$  in both groups are presented as box-whisker plots (blue boxes: non-CA cohort, red boxes: CA cohort). **F.** ROC curve was identified based on best-weighted combination of all nine common bacterial species (medium relative abundance  $\geq 0.1\%$  in either groups,  $p \leq 0.05$ ) identified by multi-variate and random forest analysis (AUC=0.892, specificity=0.814, sensitivity=0.911). In box plots, bounds of boxes show IQR, top and bottom whiskers demonstrate maximum and minimum, lines in the middle of the box indicate median, and stars show mean of the data. + signs indicate outliers.

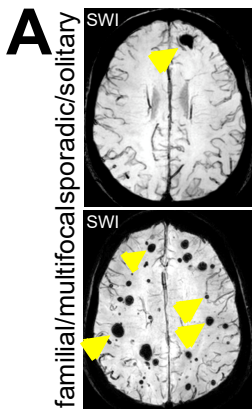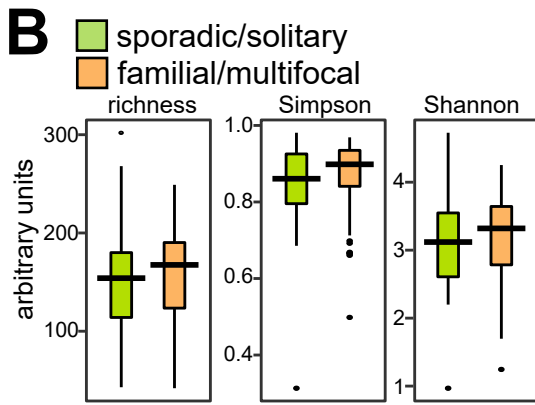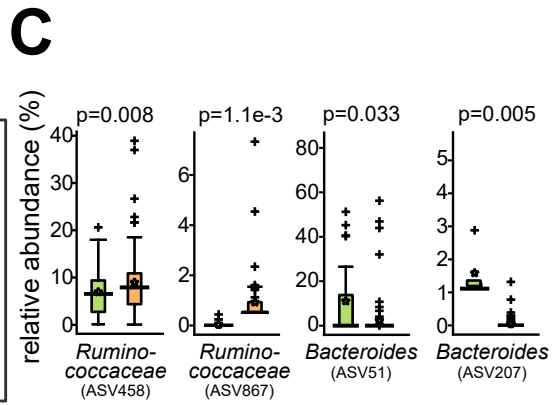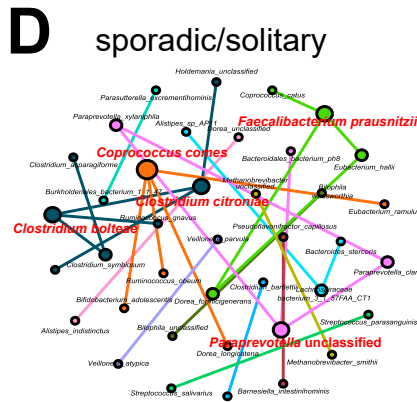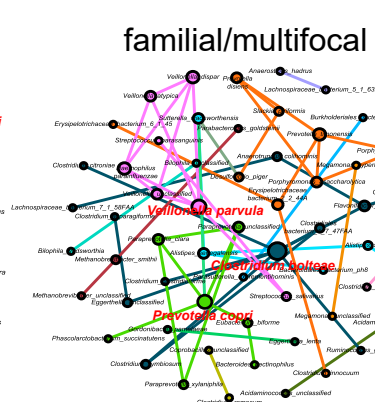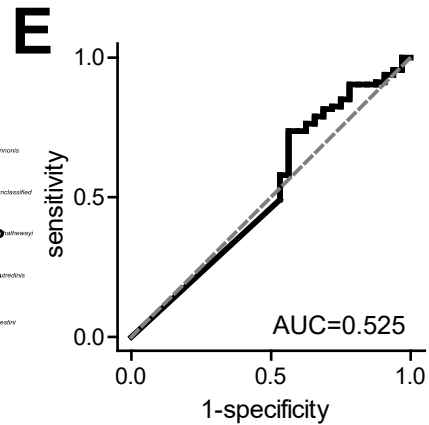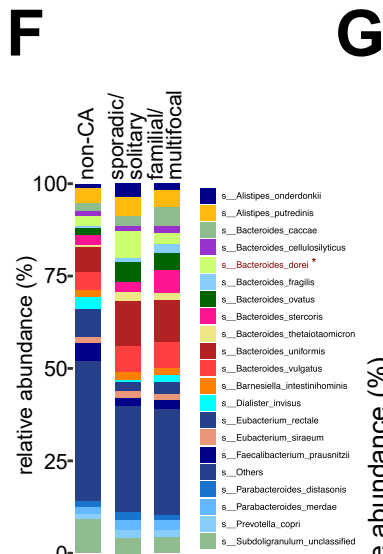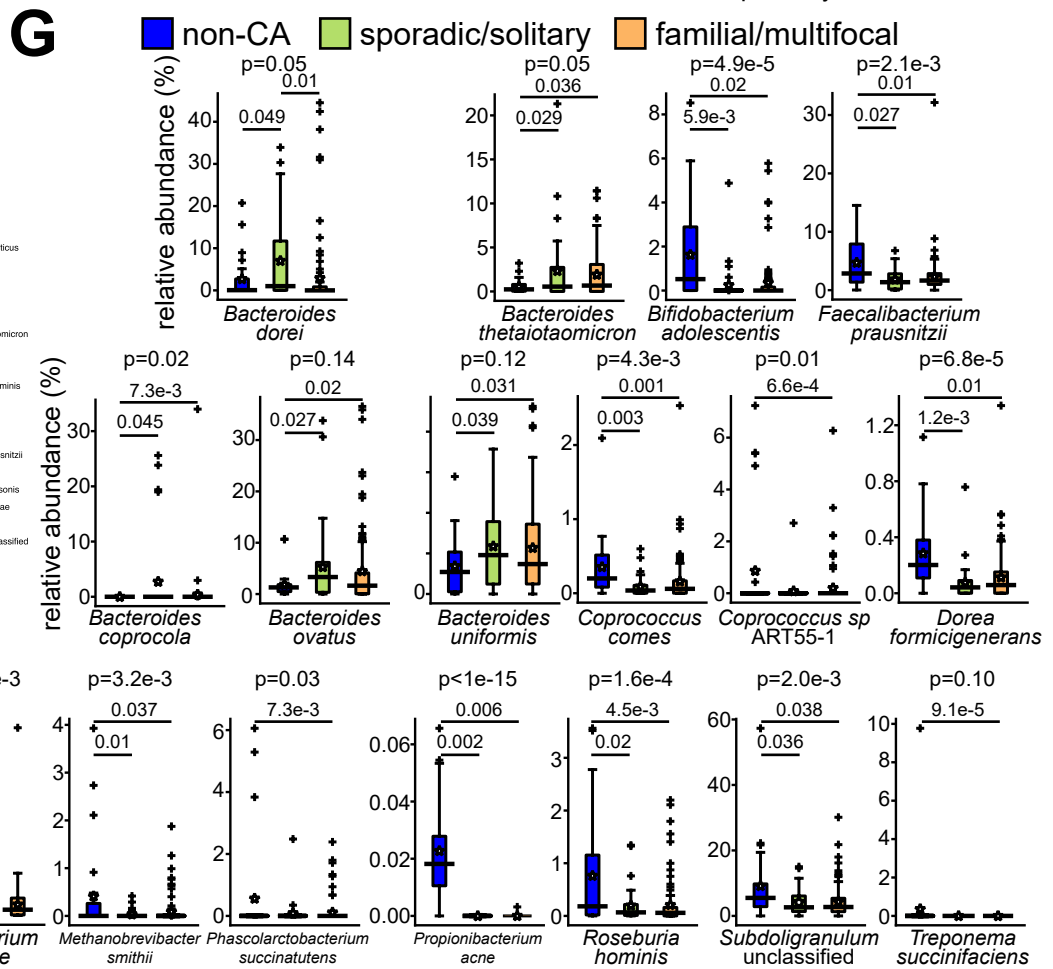

## Supplementary Figure 2. CA patients with or without CCM germline mutations.

**A.** MRI images of CA patients. Susceptibility weighted imaging (SWI) showing a sporadic/solitary CA patient with a left frontal CA (left panel) and a familial/multifocal CA patient with >100 different sized lesions throughout the brain (right panel). CA lesions are indicated by yellow arrows. **B.**  $\alpha$  diversity analyses of fecal samples by richness, Shannon and Simpson indices based on 16S rRNA gene amplicon sequencing data, presented as box-whisker plots (n=28 sporadic/solitary, n=87 familial/multifocal, Kruskal-Wallis one way analysis of variance test, blue boxes: sporadic/solitary patients, red boxes: familial/multifocal patients). **C.** Multi-variate taxonomic analyses at ESV level between sporadic/solitary and familial/multifocal CA patients. ESVs with significantly different relative abundances are presented as box-whisker plots (n=28 sporadic/solitary, n=87 familial/multifocal, ANCOM analysis followed by two-sided Mann-Whitney U test with Benjamini-Hochberg FDR correction, blue boxes: sporadic/solitary patients, red boxes: familial/multifocal patients). **D.** Organization of microbiome species in sporadic/solitary and familial/multifocal cohorts. Co-occurrence network analyses were performed at species level, as determined by metagenomic shotgun sequencing data analysis (n=29 sporadic, n=93 familial, keystone species are labeled in red). orange: CA patients with familial/multifocal disease). **E.** ROC model for *B. dorei* to differentiate sporadic/solitary and familial/multifocal CA patients (AUC=0.514, specificity=0.438, sensitivity=0.716). **F.** Top 20 most abundant species identified by metagenomic shotgun sequencing data analysis among non-CA, CA patients with sporadic/solitary disease, and familial/multifocal disease. The species with significantly different abundance is presented in maroon color. **G.** Multigroup analysis of metagenomic shotgun sequencing data among non-CA, sporadic/solitary, and familial/multifocal patients at species level. Species with significantly different abundance are presented as box-whisker plots (n=28 sporadic/solitary, n=87 familial/multifocal, ANCOM analysis followed by two-sided Mann-Whitney U test with Benjamini-Hochberg FDR correction, blue: non-CA individuals, green: CA patients with sporadic/solitary disease, orange: CA patients with familial/multifocal disease). P values of *post hoc* analysis identified significant differences are shown. In box plots, bounds of boxes show IQR, top and bottom whiskers demonstrate maximum and minimum, lines in the middle of the box indicate median, and stars show mean of the data. + signs indicate outliers.



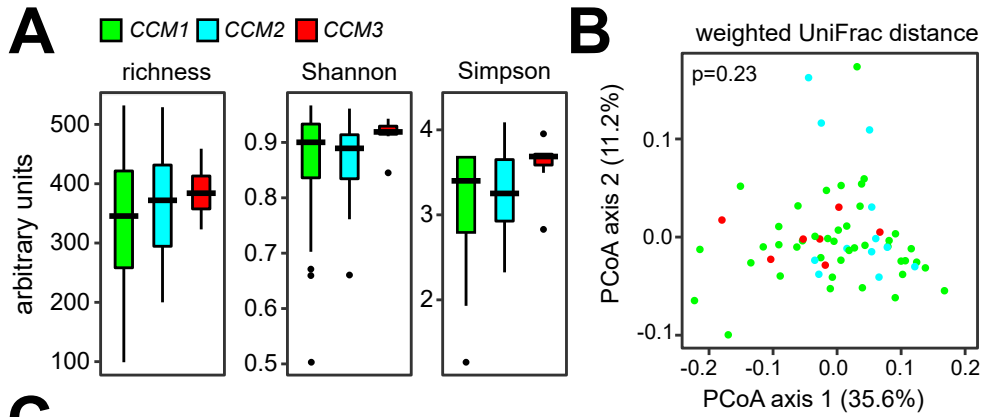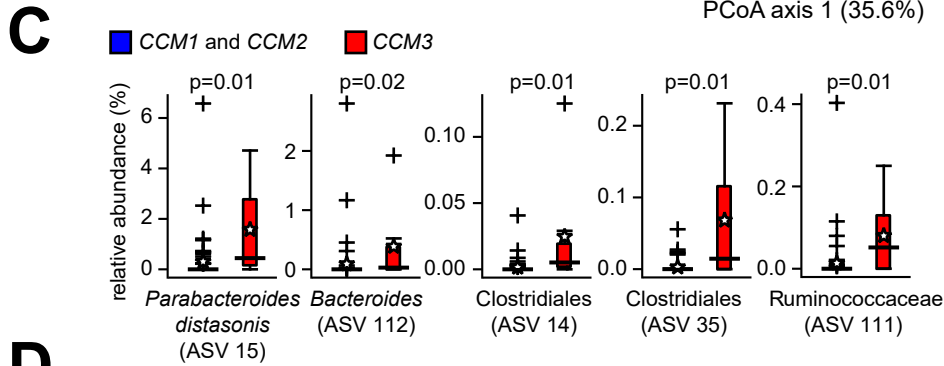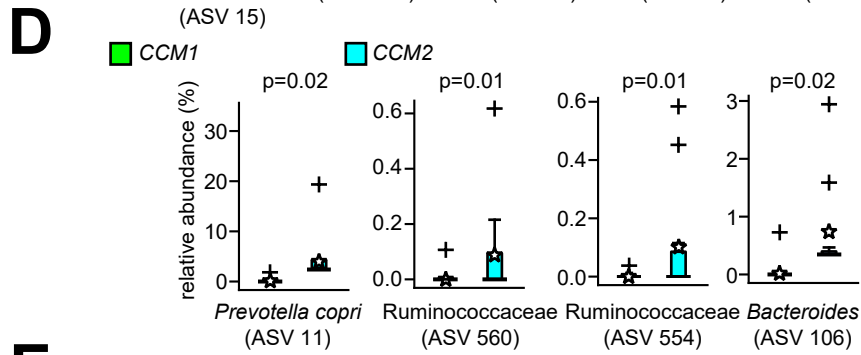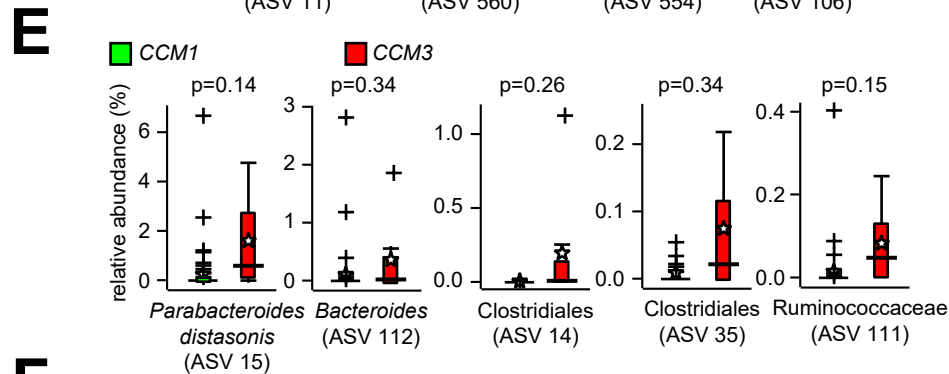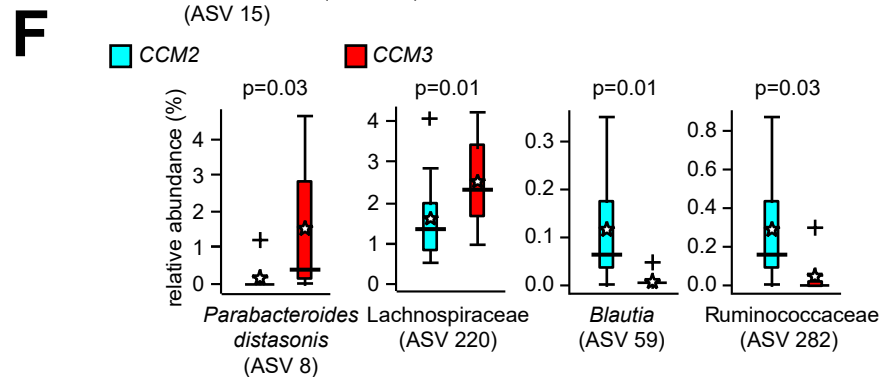

### **Supplementary Figure 3. CA patients with *CCM1*, *CCM2*, and *CCM3* mutations.**

16S rRNA gene amplicon sequencing data was used to determine microbiome differences in CA patients with mutations of different *CCM* genes. **A.**  $\alpha$  diversity analysis of fecal microbiome of CA patients with *CCM1* (n=43, green), *CCM2* (n=12, cyan), and *CCM3* (n=7, red) mutations (Kruskal-Wallis one way analysis of variance test). **B.** PCoA plot for  $\beta$  diversity analysis of fecal microbiome of CA patients with *CCM1* (green), *CCM2* (cyan), and *CCM3* (red) mutations (PERMANOVA test). **C.** Patients with *CCM1* or *CCM2* mutations (n= 55, blue) relative to patients with *CCM3* mutations (n=7, red, ANCOM analysis followed by two-sided Mann-Whitney U test with Benjamini-Hochberg FDR correction). **D.** Patients with *CCM1* mutations (n=43, green) relative to patients with *CCM2* mutations (n=12, cyan, ANCOM analysis followed by two-sided Mann-Whitney U test with Benjamini-Hochberg FDR correction). **E.** Patients with *CCM1* (n=43, green) relative to patients with *CCM3* mutations (n=7 red, ANCOM analysis followed by two-sided Mann-Whitney U test with Benjamini-Hochberg FDR correction). Please note none of the listed ESVs in this panel is statistically significant. **F.** Patients with *CCM2* mutations (n=12, cyan) relative to patients with *CCM3* mutations (n=7, red, ANCOM analysis followed by two-sided Mann-Whitney U test with Benjamini-Hochberg FDR correction). In box plots, bounds of boxes show IQR, top and bottom whiskers demonstrate maximum and minimum, lines in the middle of the box indicate median, and stars show mean of the data. + signs indicate outliers.

**A** ■ non-aggressive  
■ aggressive

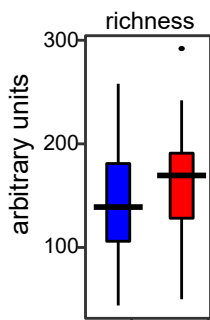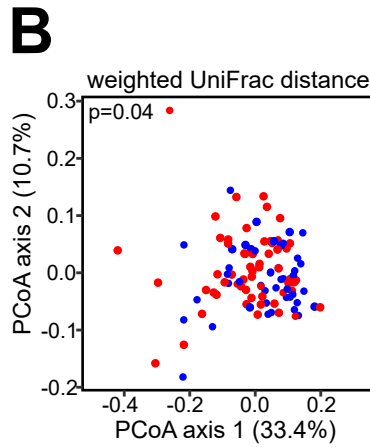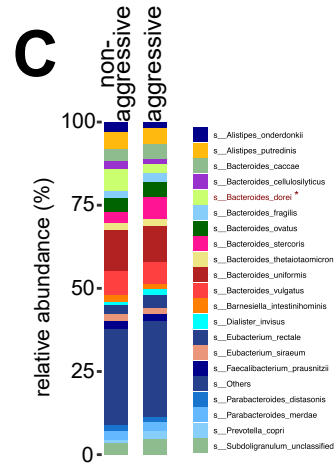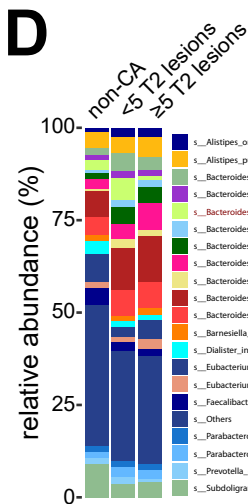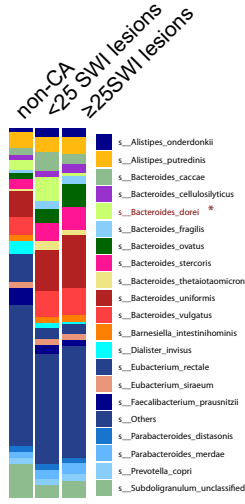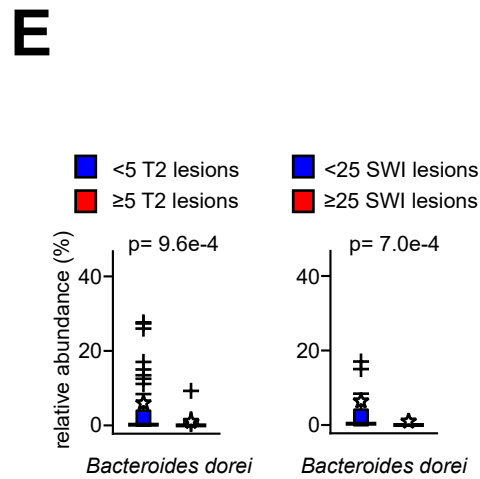

**F**

| Taxa                     | Continuous Variable | Correlation | p (FDR corrected) |
|--------------------------|---------------------|-------------|-------------------|
| <i>Bacteroides dorei</i> | Number_SWI          | -0.32       | 0.0013            |
| <i>Bacteroides dorei</i> | Number_T2           | -0.24       | 0.012             |

**G** ■ non-CASH  
■ CASH

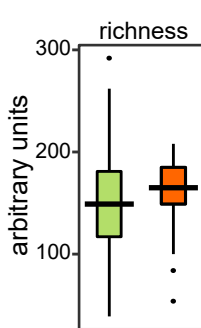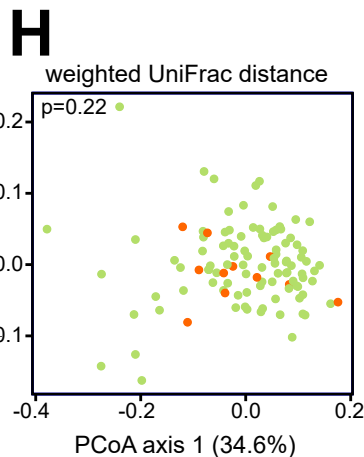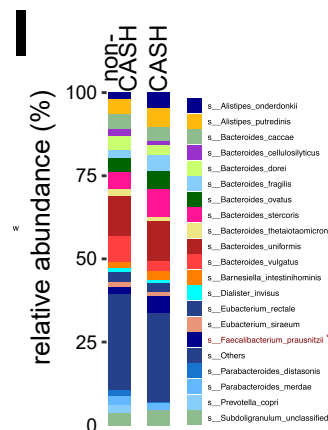

#### Supplementary Figure 4. CA patients with different disease properties.

**A.**  $\alpha$  diversity analyses of fecal samples of CA patients with non-aggressive and aggressive disease by richness index based on 16S rRNA gene amplicon sequencing data (n=43 non-aggressive patients, n=58 aggressive patients, Kruskal-Wallis one way analysis of variance test, blue box: non-aggressive CA patients, red box: aggressive CA patients). **B.** PCoA analysis of  $\beta$  diversity of fecal samples based on 16S rRNA gene amplicon sequencing data of CA patients with non-aggressive and aggressive disease (n=43 non-aggressive patients, n=58 aggressive patients, PERMANOVA test, blue: non-aggressive CA patients, red: aggressive CA patients). **C.** Top 20 most abundant species identified based on metagenomic shotgun sequencing data. Species with significantly different abundance are presented in maroon color. **D.** Top 20 most abundant species identified by metagenomic shotgun sequencing data analysis between familial/multifocal patients with or without high CA lesion counts identified by either T2-weighted or susceptibility weighted imaging (SWI) MRI imaging modules. The species with significantly different abundance is presented in maroon color. **E.** Multivariate analysis of metagenomic shotgun sequencing data between familial/multifocal patients with or without high CA lesion counts identified by either T2-weighted (n=44 for low lesion count, n=28 for high lesion counts, ANCOM analysis followed by two-sided Mann-Whitney U test with Benjamini-Hochberg FDR correction, blue boxes: low lesion counts, red boxes: high lesion counts) or SWI (n=37 for low lesion count, n=28 for high lesion counts, ANCOM analysis followed by two-sided Mann-Whitney U test with Benjamini-Hochberg FDR correction, blue boxes: low lesion counts, red boxes: high lesion counts) MRI imaging modules. Species with significantly different abundance are presented as box-whisker plots. **F.** Negative correlation of T2-weighted (n=65) or SWI (n=72) lesion number in familial/multifocal patients with relative abundance of *B. dorei* (Spearman correlation and GLM test with Benjamini-Hochberg FDR correction). **G.**  $\alpha$  diversity analyses of fecal samples of CA patients with non-CASH and CASH disease by richness index based on 16S rRNA gene amplicon sequencing data (n=93 non-CASH patients, n=13 CASH patients, PERMANOVA test, green box: non-CASH CA patients, orange box: CASH CA patients). **H.** PCoA analysis of  $\beta$  diversity of fecal samples based on 16S rRNA gene amplicon sequencing data of CA patients with non-CASH and CASH disease (n=93 non-CASH patients, n=13 CASH patients, PERMANOVA test, green: non-CASH CA patients, orange: CASH CA patients). **I.** Top 20 most abundant species identified based on metagenomic shotgun sequencing data. Species with significantly different abundance are presented in maroon color. In box plots, bounds of boxes show IQR, top and bottom whiskers demonstrate maximum and minimum, lines in the middle of the box indicate median, and stars show mean of the data. + signs indicate outliers.

**A** ■ non-CA female ■ non-CA male ■ CA female ■ CA male  
16S rRNA amplicon sequencing

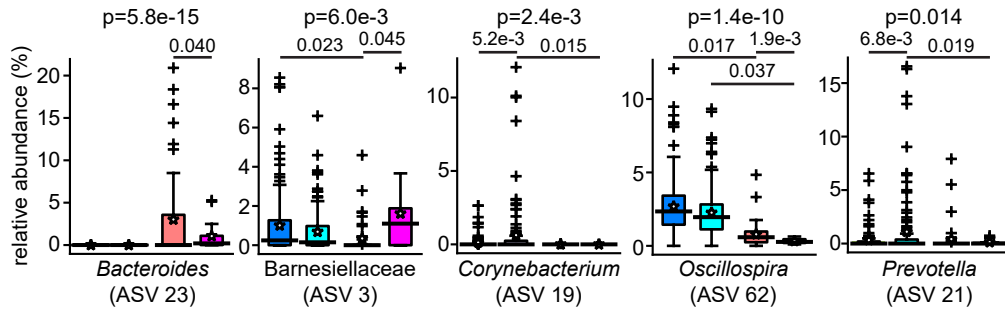

**B** ■ non-CA female ■ non-CA male ■ CA female ■ CA male  
metagenomic shotgun sequencing

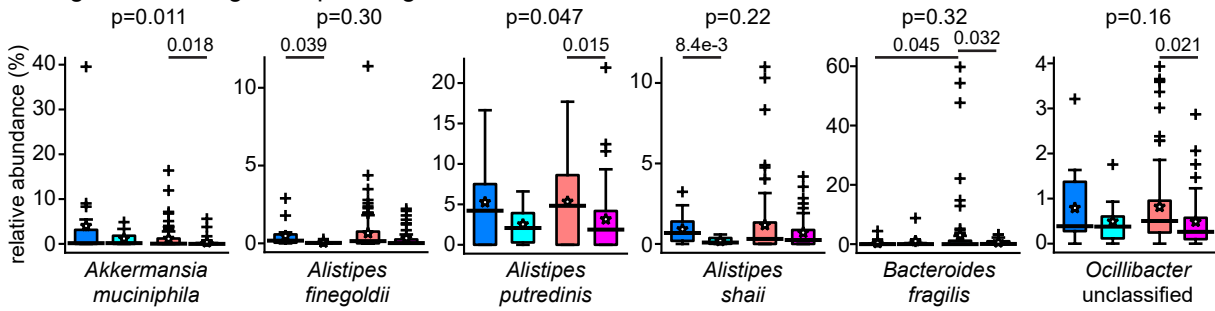

**C** ■ non-aggressive female ■ non-aggressive male ■ aggressive female ■ aggressive male  
16S rRNA amplicon sequencing

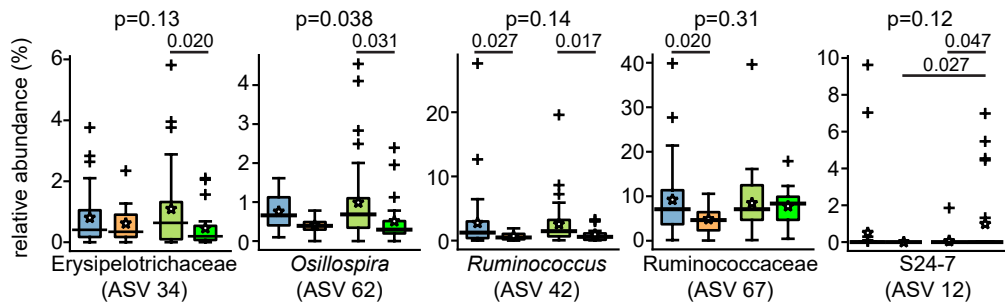

**D** ■ non-aggressive female ■ non-aggressive male ■ aggressive female ■ aggressive male  
metagenomic shotgun sequencing

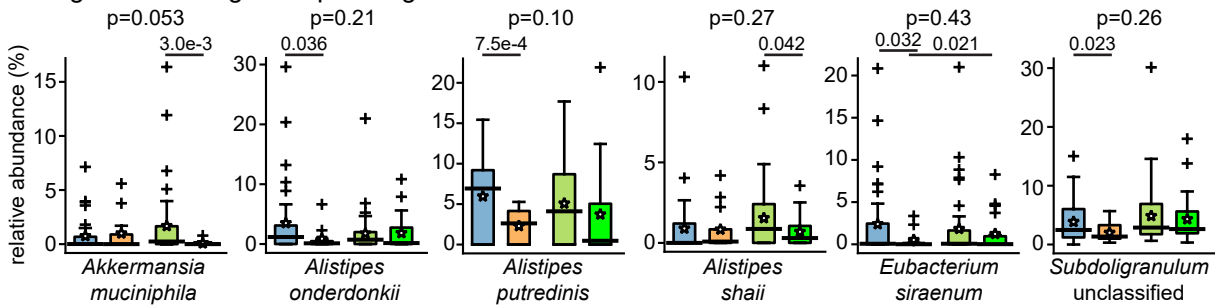

### **Supplementary Figure 5. Gender differences of microbiome in CA patients.**

**A.** Multi-group, multi-variate analysis of female and male fecal microbiome based on 16S rRNA gene amplicon sequencing data according to presence or absence of CA (n=128 for non-CA female, n=122 for non-CA male, n=80 for CA female, n=35 for CA male, ANCOM analysis followed by two-sided Mann-Whitney U test with Benjamini-Hochberg FDR correction). **B.** Multi-group, multi-variate analysis of female and male microbiome based on metagenomic shotgun sequencing data according to presence or absence of CA (n=17 for non-CA female, n=10 for non-CA male, n=86 for CA female, n=36 for CA male, ANCOM analysis followed by two-sided Mann-Whitney U test with Benjamini-Hochberg FDR correction). **C.** Multi-group, multi-variate analysis of female and male fecal microbiome based on 16S rRNA gene amplicon sequencing data according to presence or absence of aggressive CA (n=33 for non-aggressive female, n=10 for non-aggressive male, n=37 for aggressive female, n=21 for aggressive male, ANCOM analysis followed by two-sided Mann-Whitney U test with Benjamini-Hochberg FDR correction). **D.** Multi-group, multi-variate analysis of female and male fecal microbiome based on metagenomic shotgun sequencing data according to presence or absence of aggressive CA (n=34 for non-aggressive female, n=11 for non-aggressive male, n=41 for aggressive female, n=21 for aggressive male, ANCOM analysis followed by two-sided Mann-Whitney U test with Benjamini-Hochberg FDR correction). For all panels, p values for multi-group analyses, and significant p values in post hoc tests are shown. In box plots, bounds of boxes show IQR, top and bottom whiskers demonstrate maximum and minimum, lines in the middle of the box indicate median, and stars show mean of the data. + signs indicate outliers.

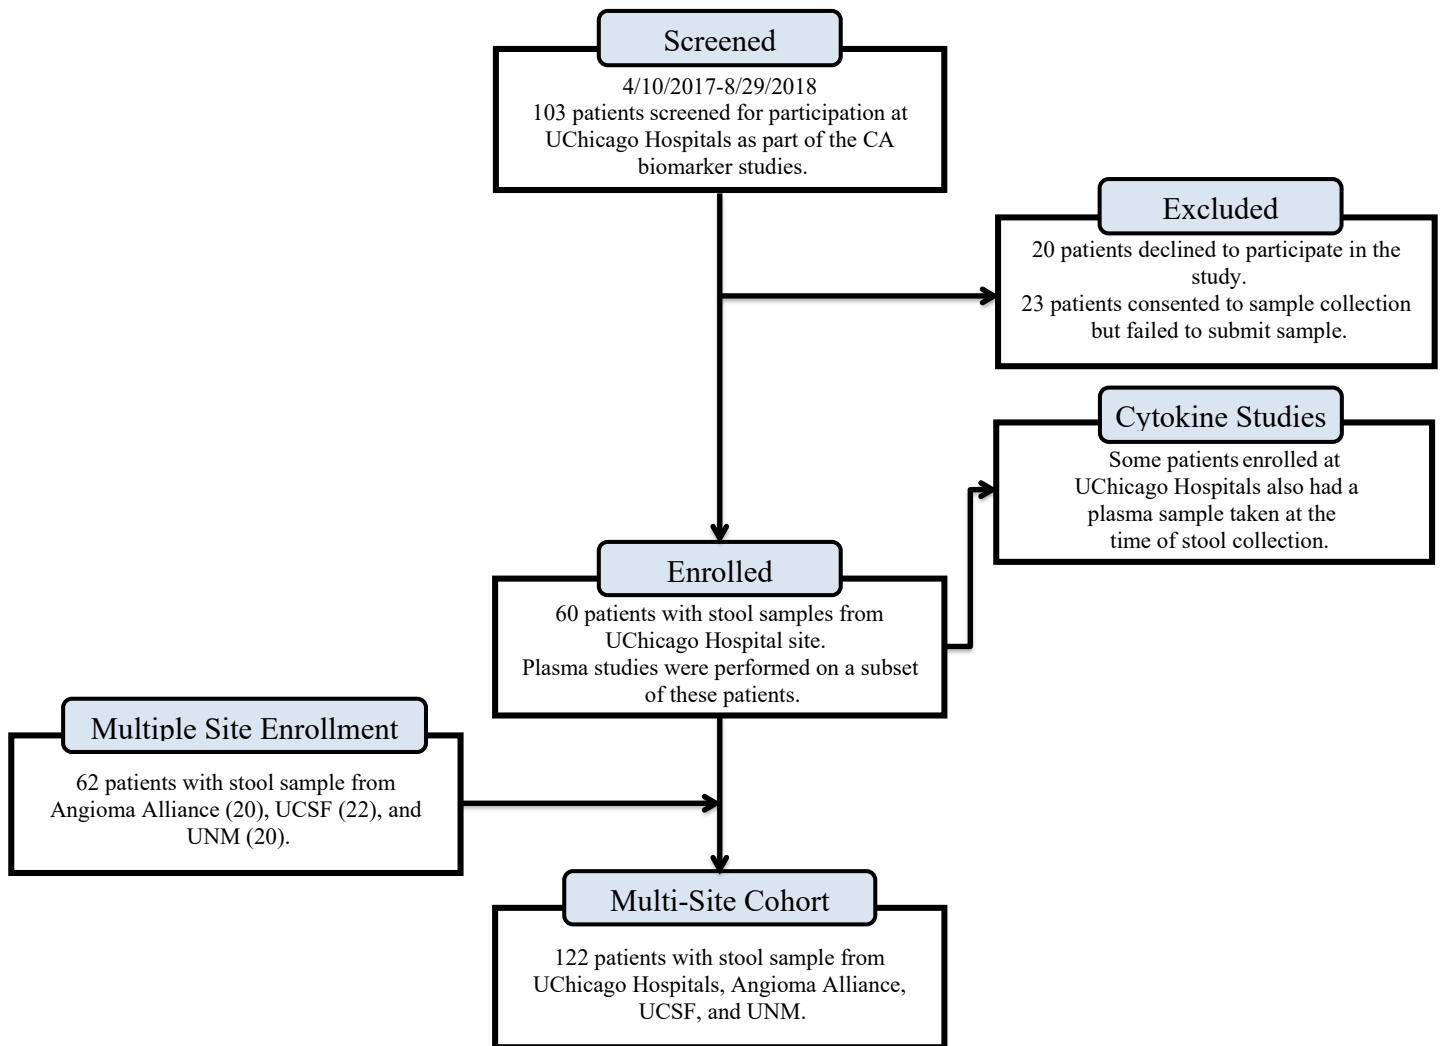

**Supplementary Figure 6. Patient enrollment and analysis CONSORT diagram.**



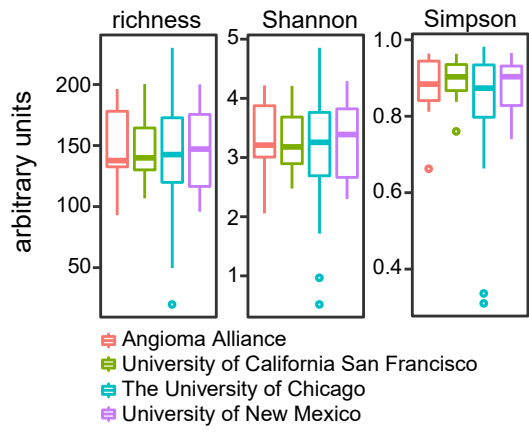

**Supplementary Figure 7. Similar microbiome in samples collected at four sites.**

$\alpha$  diversity analyses of fecal samples of CA patients from four different collection centers (n=19 for Angioma Alliance, n=21 for University of California San Francisco, n=55 for the University of Chicago, n=20 for University of New Mexico, Kruskal-Wallis one way analysis of variance test). In box plots, bounds of boxes show IQR, top and bottom whiskers demonstrate maximum and minimum, lines in the middle of the box indicate median, and stars show mean of the data. + signs indicate outliers.

## ***Supplementary Tables***

|                                 | IFNg   | IL-6    | IL-10   | IL-1b   | TNF     | CRP     | TLR4    | sCD14   | LPB     | VEGF    | endoglin | THBS1   | TM      |                         |
|---------------------------------|--------|---------|---------|---------|---------|---------|---------|---------|---------|---------|----------|---------|---------|-------------------------|
| s__Bacteroides_cellulosilyticus | 0.6986 | -0.0035 | 0.07315 | -0.1064 | -0.055  | -0.0061 | -0.1405 | 0.1842  | 0.04533 | 0.35341 | 0.13664  | -0.2346 | 0.0329  | correlation coefficient |
| s__Bacteroides_cellulosilyticus | <.0001 | 0.9851  | 0.6958  | 0.5688  | 0.7687  | 0.9695  | 0.3572  | 0.2152  | 0.7729  | 0.0511  | 0.3598   | 0.1623  | 0.8467  | p value                 |
|                                 | 31     | 31      | 31      | 31      | 31      | 42      | 45      | 47      | 43      | 31      | 47       | 37      | 37      | n                       |
| s__Bacteroides_dorei            | -0.112 | 0.05671 | 0.07457 | -0.1322 | 0.07319 | -0.0145 | -0.0295 | 0.23014 | -0.2042 | 0.19088 | 0.1269   | 0.01972 | -0.0127 |                         |
| s__Bacteroides_dorei            | 0.5478 | 0.7619  | 0.6901  | 0.4783  | 0.6956  | 0.9276  | 0.8474  | 0.1197  | 0.189   | 0.3037  | 0.3953   | 0.9078  | 0.9405  |                         |
|                                 | 31     | 31      | 31      | 31      | 31      | 42      | 45      | 47      | 43      | 31      | 47       | 37      | 37      |                         |
| s__Bacteroides_eggerthii        | -0.068 | -0.071  | 0.00454 | -0.0512 | -0.2058 | 0.03835 | -0.0471 | -0.1033 | -0.0949 | 0.02753 | 0.17349  | -0.0394 | 0.0896  |                         |
| s__Bacteroides_eggerthii        | 0.716  | 0.7045  | 0.9806  | 0.7845  | 0.2666  | 0.8095  | 0.7589  | 0.4895  | 0.5451  | 0.8831  | 0.2435   | 0.8168  | 0.5979  |                         |
|                                 | 31     | 31      | 31      | 31      | 31      | 42      | 45      | 47      | 43      | 31      | 47       | 37      | 37      |                         |
| s__Bifidobacterium_adolescentis | -0.074 | 0.32674 | -0.0852 | 0.47557 | -0.1288 | 0.00429 | 0.07809 | 0.20024 | 0.06711 | -0.2922 | 0.01891  | -0.0107 | 0.28404 |                         |
| s__Bifidobacterium_adolescentis | 0.6929 | 0.0728  | 0.6487  | 0.0069  | 0.49    | 0.9785  | 0.6101  | 0.1772  | 0.669   | 0.1107  | 0.8996   | 0.9498  | 0.0884  |                         |
|                                 | 31     | 31      | 31      | 31      | 31      | 42      | 45      | 47      | 43      | 31      | 47       | 37      | 37      |                         |
| s__Dorea_unclassified           | 0.0307 | 0.0581  | -0.0337 | 0.00883 | -0.1563 | -0.0508 | -0.0216 | -0.0236 | -0.0796 | -0.0602 | 0.09471  | 0.15548 | -0.2234 |                         |
| s__Dorea_unclassified           | 0.8697 | 0.7562  | 0.8573  | 0.9624  | 0.4013  | 0.7494  | 0.8879  | 0.8751  | 0.612   | 0.7479  | 0.5266   | 0.3581  | 0.1838  |                         |
|                                 | 31     | 31      | 31      | 31      | 31      | 42      | 45      | 47      | 43      | 31      | 47       | 37      | 37      |                         |
| s__Enterobacter_cloacae         |        |         |         |         |         |         | -0.0522 | -0.1682 |         |         | 0.07469  | 0.02084 | 0.07366 |                         |
| s__Enterobacter_cloacae         |        |         |         |         |         |         | 0.7333  | 0.2585  |         |         | 0.6178   | 0.9026  | 0.6648  |                         |
|                                 | 31     | 31      | 31      | 31      | 31      | 42      | 45      | 47      | 43      | 31      | 47       | 37      | 37      |                         |
| s__Escherichia_coli             | -0.082 | -0.1183 | -0.0836 | -0.1695 | 0.16161 | -0.146  | 0.17683 | -0.2742 | 0.28445 | -0.2232 | -0.063   | -0.0031 | -0.1251 |                         |
| s__Escherichia_coli             | 0.6601 | 0.5262  | 0.655   | 0.3621  | 0.3851  | 0.3563  | 0.2452  | 0.0622  | 0.0645  | 0.2274  | 0.6739   | 0.9854  | 0.4605  |                         |
|                                 | 31     | 31      | 31      | 31      | 31      | 42      | 45      | 47      | 43      | 31      | 47       | 37      | 37      |                         |
| s__Faecalibacterium_prausnitzii | -0.086 | 0.12071 | 0.23674 | 0.1965  | 0.04348 | -0.136  | -0.0205 | -0.0589 | -0.3316 | -0.0849 | -0.3119  | 0.29911 | -0.2754 |                         |
| s__Faecalibacterium_prausnitzii | 0.6447 | 0.5177  | 0.1997  | 0.2894  | 0.8163  | 0.3904  | 0.8936  | 0.6943  | 0.0298  | 0.6499  | 0.0329   | 0.0721  | 0.099   |                         |
|                                 | 31     | 31      | 31      | 31      | 31      | 42      | 45      | 47      | 43      | 31      | 47       | 37      | 37      |                         |
| s__Lactobacillus_rhamnosus      | -0.044 | -0.0758 | -0.0625 | -0.0563 | 0.11243 | -0.0876 | -0.0505 | 0.1937  | -0.1621 | -0.145  | 0.10912  | -0.0084 | -0.0281 |                         |
| s__Lactobacillus_rhamnosus      | 0.8138 | 0.6851  | 0.7382  | 0.7635  | 0.547   | 0.581   | 0.742   | 0.192   | 0.2991  | 0.4364  | 0.4653   | 0.9607  | 0.8687  |                         |
|                                 | 31     | 31      | 31      | 31      | 31      | 42      | 45      | 47      | 43      | 31      | 47       | 37      | 37      |                         |
| s__Odoribacter_laneus           | -0.056 | -0.0523 | -0.0682 | -0.1215 | 0.12705 | -0.1177 | -0.0354 | -0.072  | -0.0557 | 0.06154 | -0.1527  | -0.1924 | 0.02375 |                         |
| s__Odoribacter_laneus           | 0.7647 | 0.7798  | 0.7154  | 0.5149  | 0.4958  | 0.458   | 0.8177  | 0.6308  | 0.7227  | 0.7422  | 0.3056   | 0.2539  | 0.889   |                         |
|                                 | 31     | 31      | 31      | 31      | 31      | 42      | 45      | 47      | 43      | 31      | 47       | 37      | 37      |                         |
| s__Odoribacter_splanchnicus     | 0.0349 | -0.1113 | 0.09291 | -0.05   | -0.0927 | -0.093  | -0.0535 | -0.1591 | -0.2022 | -0.28   | -0.1778  | 0.00343 | -0.1674 |                         |
| s__Odoribacter_splanchnicus     | 0.852  | 0.551   | 0.6191  | 0.7895  | 0.6201  | 0.5581  | 0.7272  | 0.2854  | 0.1934  | 0.1271  | 0.2318   | 0.9839  | 0.322   |                         |
|                                 | 31     | 31      | 31      | 31      | 31      | 42      | 45      | 47      | 43      | 31      | 47       | 37      | 37      |                         |
| s__Oscillibacter_unclassified   | -0.013 | 0.09022 | -0.0377 | 0.16693 | 0.50762 | -0.239  | 0.54661 | 0.05435 | 0.38985 | 0.00834 | -0.1364  | -0.0937 | -0.0072 |                         |
| s__Oscillibacter_unclassified   | 0.9426 | 0.6293  | 0.8404  | 0.3694  | 0.0036  | 0.1275  | 0.0001  | 0.7167  | 0.0098  | 0.9645  | 0.3607   | 0.5813  | 0.9663  |                         |
|                                 | 31     | 31      | 31      | 31      | 31      | 42      | 45      | 47      | 43      | 31      | 47       | 37      | 37      |                         |

|                                   | IFNg   | IL-6    | IL-10   | IL-1b   | TNF     | CRP     | TLR4    | sCD14   | LPB     | VEGF    | endoglin | THBS1   | TM      |                         |
|-----------------------------------|--------|---------|---------|---------|---------|---------|---------|---------|---------|---------|----------|---------|---------|-------------------------|
| non-CA vs CA species              | -0.074 | 0.13259 | 0.19211 | 0.23752 | -0.0151 | -0.117  | 0.02105 | 0.04327 | -0.2458 | -0.196  | -0.2569  | 0.20045 | -0.0501 | correlation coefficient |
|                                   | 0.6932 | 0.4771  | 0.3005  | 0.1982  | 0.9357  | 0.4606  | 0.8908  | 0.7727  | 0.1122  | 0.2908  | 0.0813   | 0.2342  | 0.7685  | p value                 |
|                                   | 31     | 31      | 31      | 31      | 31      | 42      | 45      | 47      | 43      | 31      | 47       | 37      | 37      | n                       |
| non-aggressive vs aggressive spec | 0.0196 | 0.1394  | -0.0729 | 0.12369 | 0.07989 | -0.0699 | 0.10694 | 0.11712 | 0.12256 | -0.2081 | -0.0344  | 0.07294 | 0.04405 |                         |
|                                   | 0.9167 | 0.4545  | 0.6966  | 0.5074  | 0.6692  | 0.6601  | 0.4844  | 0.433   | 0.4336  | 0.2613  | 0.8186   | 0.6679  | 0.7957  |                         |
|                                   | 31     | 31      | 31      | 31      | 31      | 42      | 45      | 47      | 43      | 31      | 47       | 37      | 37      |                         |
| non-CASH vs CASH species          | -0.178 | 0.15617 | 0.1529  | 0.27414 | 0.33692 | -0.2388 | 0.30804 | -0.0458 | -0.0459 | -0.0973 | -0.3675  | 0.20021 | -0.2262 |                         |
|                                   | 0.3391 | 0.4015  | 0.4116  | 0.1356  | 0.0638  | 0.1277  | 0.0395  | 0.7598  | 0.7699  | 0.6026  | 0.011    | 0.2348  | 0.1783  |                         |
|                                   | 31     | 31      | 31      | 31      | 31      | 42      | 45      | 47      | 43      | 31      | 47       | 37      | 37      |                         |

Supplementary Table 1. Correlation between bacterial species and plasma biomarkers.

| Patient Characteristics                               |                    |                               |                                               |                                  |                  |                  |                             |
|-------------------------------------------------------|--------------------|-------------------------------|-----------------------------------------------|----------------------------------|------------------|------------------|-----------------------------|
| Group (n=122)                                         | Total<br>(122)     | Sporadic/<br>Solitary<br>(29) | Familial/Multifocal<br>Combined total<br>(93) | Familial/Multifocal<br>Subgroups |                  |                  |                             |
|                                                       |                    |                               |                                               | CCM 1<br>(45)                    | CCM2<br>(13)     | CCM 3<br>(9)     | Unknown<br>Genotype<br>(26) |
| Age Years- Mean (SD)                                  | 41.68<br>(18.71)   | 45.51<br>(15.56)              | 40.49<br>(19.51)                              | 39.48<br>(20.23)                 | 38.23<br>(23.71) | 37.64<br>(16.27) | 44.84<br>(16.96)            |
| Female                                                | 86                 | 20                            | 66                                            | 38                               | 6                | 7                | 16                          |
| Aggressive Features <sup>ψ</sup>                      | 62                 | 7                             | 55                                            | 30                               | 4                | 5                | 16                          |
| • 1 <sup>st</sup> Hemorrhage ≤18 years old            | 23                 | 3                             | 20                                            | 11                               | 2                | 3                | 4                           |
| • ≥5 T <sub>2</sub> -weighted lesions                 | NA*                | NA*                           | 28                                            | 16                               | 1                | 3                | 8                           |
| • ≥25 lesions on SWI                                  | NA*                | NA*                           | 28                                            | 17                               | 2                | 3                | 6                           |
| • ≥2 adjudicated symptomatic hemorrhages              | 16                 | 4                             | 12                                            | 4                                | 1                | 0                | 7                           |
| T <sub>2</sub> Lesion Count- mean (SD)                | NA*                | 1*                            | 10.36<br>(42.15)                              | 4.61<br>(5.35)                   | 3.75<br>(3.57)   | 15.00<br>(6.56)  | 4.26<br>(4.05)              |
| SWI Lesion Count- mean (SD)                           | NA*                | 1*                            | 49.20<br>(74.67)                              | 66.00<br>(91.10)                 | 14.00<br>(16.9)  | 54.00<br>(40.78) | 35.52<br>(56.02)            |
| CASH (%)                                              | 13 (10.7)          | 5 (17.2)                      | 8 (8.6)                                       | 3 (6.67)                         | 0                | 1 (11.1)         | 4 (15.4)                    |
| <b>Microbiome Survey Response**</b>                   |                    |                               |                                               |                                  |                  |                  |                             |
| Self-reported inflammatory bowel disease (IBD)        | 11.48%<br>(14/122) | 17.24 %<br>(5/29)             | 9.68 %<br>(9/93)                              | 11.12 %<br>(5/45)                | 7.69 %<br>(1/13) | 11.11 %<br>(1/9) | 7.69%<br>(2/26)             |
| Self-reported antibiotics usage within prior 6 months | 27.50%<br>(22/80)  | 24.13 %<br>(7/29)             | 29.41%<br>(15/51)                             | 13.51 %<br>(5/37)                | 9.09 %<br>(1/11) | 33.34 %<br>(1/3) | 38.10 %<br>(8/21)           |

<sup>ψ</sup> Aggressive features are defined as patients have at least one of the four components (Mikati et al.).

\* Lesion count in the sporadic form of the disease is always one except in rare cases.

\*\* Microbiome Survey completed at the time of stool collection, denominator represents those that completed the survey.

SWI- susceptibility weighted images

SD- standard deviation

CASH- CA with symptomatic hemorrhage

**Supplementary Table 2. CA Patient Characteristics**

| Screened Patient Characteristics-Not enrolled    |                            |                                               |                                  |             |             |                         |
|--------------------------------------------------|----------------------------|-----------------------------------------------|----------------------------------|-------------|-------------|-------------------------|
| Group (n=43 total)                               | Sporadic/<br>Solitary (31) | Familial/Multifocal<br>Combined total<br>(12) | Familial/Multifocal<br>Subgroups |             |             |                         |
|                                                  |                            |                                               | CCM 1 (3)                        | CCM2 (4)    | CCM 3 (3)   | Unknown<br>Genotype (2) |
| Age Years- Mean (SD)                             | 45.4 (11.8)                | 34.7 (13.6)                                   | 39.3 (19.1)                      | 38.5 (14.4) | 29.0 (11.5) | 28.5 (10.6)             |
| Female (%)                                       | 21(67.7)                   | 9 (75)                                        | 2 (66.7)                         | 4 (100)     | 3 (100)     | 0                       |
| Aggressive Features $\psi$                       | 7                          | 3                                             | 1                                | 0           | 2           | 0                       |
| • 1 <sup>st</sup> Hemorrhage $\leq$ 18 years old | 0                          | 1                                             | 0                                | 0           | 1           | 0                       |
| • $\geq$ 5 T <sub>2</sub> -weighted lesions      | NA*                        | 3                                             | 1                                | 0           | 2           | 0                       |
| • $\geq$ 25 lesions on SWI                       | NA*                        | 2                                             | 1                                | 0           | 1           | 0                       |
| • $\geq$ 2 adjudicated symptomatic hemorrhages   | 4                          | 1                                             | 1                                | 0           | 0           | 0                       |
| T <sub>2</sub> Lesion Count- mean (SD)           | 1*                         | 4.3 (5.5)                                     | 6.3 (5.9)                        | 1.0 (0.82)  | 8.7 (8.1)   | 1.5 (0.7)               |
| SWI Lesion Count- mean (SD)                      | 1*                         | 17.1 (29.9)                                   | 42 (55.7)                        | 1.0 (0.82)  | 20.3 (15.4) | 7.0 (1.4)               |

$\psi$  Aggressive features are defined as patients have at least one of the four components (Mikati et al.).

\* Lesion count in the sporadic form of the disease is always one except in rare cases not observed in this series

SD- standard deviation

SWI- susceptibility weighted images

ND- no data

**Supplementary Table 3. CA Patient Characteristics of Screened Cases Not Enrolled**

| Site                  | n= | Average Age (SD) | Female | Sporadic /Solitary | Aggressive | CASH | Familial/Multifocal                             |                       |                        |
|-----------------------|----|------------------|--------|--------------------|------------|------|-------------------------------------------------|-----------------------|------------------------|
|                       |    |                  |        |                    |            |      | Familial/Multifocal (Genotype CCM1/2/3/unknown) | Average T2 Count (SD) | Average SWI Count (SD) |
| University of Chicago | 60 | 46.2 (15.5)      | 41     | 28                 | 24         | 9    | 32 (11/7/3/11)                                  | 3.8 (5.2)             | 19.1 (33.9)            |
| Angioma Alliance      | 20 | 28.9 (16.00)     | 13     | 0                  | 11         | 0    | 20 (7/4/6/3)                                    | 63.6 (130.7)          | ND                     |
| UCSF                  | 22 | 41.8 (21.4)      | 15     | 1                  | 16         | 2    | 21 (7/1/0/7)                                    | 3.1 (3.4)             | 61.2 (95.2)            |
| UNM                   | 20 | 38.9 (21.6)      | 17     | 0                  | 11         | 2    | 20 (20/0/0/0)                                   | 3.9 (3.8)             | 68.06 (96.1)           |

SD- standard deviation

ND- no data

**Supplementary Table 4. Demographics Based on Site of Collection**
